# Supplementary material for: Factors Associated with Significant Weight Loss in Hospitalised Patients with COVID-19: A Retrospective Cohort Study in a Large Teaching Hospital
Source: MDPI journal article supplement (doi:10.3390/nu14194195), 2022-10-08
Supplement: s1 [file s1]

Supplementary Materials

# Factors Associated with Significant Weight Loss in Hospitalised Patients with COVID-19: A Retrospective Cohort Study in a Large Teaching Hospital

Dimitra Zannidi <sup>1</sup>, Pinal S. Patel <sup>1</sup>, Eleni Leventea <sup>1</sup>, Jessica Paciepnik <sup>1</sup>, Frances Dobson <sup>1</sup>, Caroline Heyes <sup>1</sup>, Robert J. B. Goudie <sup>2</sup>, Linda M. Oude Griep <sup>3</sup>, Jacobus Preller <sup>4</sup> and Lynsey N. Spillman <sup>1,3,\*</sup>

## SUPPLEMENTARY TABLES

**Table S1.** Risk-factors for  $\geq 10\%$  weight loss: Univariable binary logistic regression, variables adjusted for age.

| Variables                                               | $\geq 10\%$ weight loss during admission |                  |
|---------------------------------------------------------|------------------------------------------|------------------|
|                                                         | OR, (95% CI)                             | P value          |
| Age on admission (years)                                | 0.99 (0.97-1.01)                         | 0.461            |
| Sex (male)                                              | 1.50 (0.78-2.88)                         | 0.218            |
| Ethnicity (white)                                       | 0.91 (0.45-1.83)                         | 0.788            |
| Length of hospital stay (weeks)                         | <b>1.29 (1.16-1.42)</b>                  | <b>&lt;0.001</b> |
| ICU admission                                           | <b>3.69 (1.81-7.54)</b>                  | <b>&lt;0.001</b> |
| Readmitted                                              | 0.86 (0.39-1.89)                         | 0.711            |
| Discharged deceased                                     | 0.46 (0.19-1.14)                         | 0.092            |
| CRP on admission(mg/dl)                                 | 0.999 (0.995-1.003)                      | 0.546            |
| CRP $\geq 178$ mg/dl during admission                   | <b>1.90 (1.01-3.56)</b>                  | <b>0.046</b>     |
| ISARIC4C Mortality Score (% Mortality)                  | 1.18 (0.30-4.66)                         | 0.814            |
| SpO <sub>2</sub> /FiO <sub>2</sub> ratio on admission   | <b>0.997 (0.995-0.999)</b>               | <b>0.010</b>     |
| Urea on admission (mmol/l)                              | 1.02 (0.99-1.05)                         | 0.106            |
| Respiratory rate on admission (breaths/min)             | 0.96 (0.91-1.01)                         | 0.157            |
| T2DM                                                    | 1.12 (0.57-2.18)                         | 0.741            |
| Hypertension                                            | 0.86 (0.46-1.59)                         | 0.632            |
| Obesity                                                 | 1.50 (0.57-3.98)                         | 0.415            |
| Chronic neurological conditions                         | <b>2.01 (1.09-3.71)</b>                  | <b>0.025</b>     |
| Weight on admission (kg)                                | <b>1.02 (1.00-1.03)</b>                  | <b>0.013</b>     |
| Total dietetic inputs during admission                  | <b>1.06 (1.03-1.10)</b>                  | <b>&lt;0.001</b> |
| ONS during admission                                    | 1.90 (0.96-3.76)                         | 0.067            |
| Artificial feeding during admission                     | <b>2.54 (1.29-5.03)</b>                  | <b>0.007</b>     |
| SLT assessment during admission                         | <b>4.10 (2.21-7.63)</b>                  | <b>&lt;0.001</b> |
| Dysphagia on/during admission                           | <b>2.49 (1.35-4.61)</b>                  | <b>0.004</b>     |
| Anorexia on/during admission                            | 1.28 (0.67-2.42)                         | 0.454            |
| BMI $\geq 25$ kg/m <sup>2</sup> on admission            | 1.74 (0.90-3.35)                         | 0.097            |
| Malnutrition screening tool score $\geq 6$ on admission | <b>2.20 (1.18-4.10)</b>                  | <b>0.013</b>     |

Values present OR (95% CI) for each age-adjusted covariate. OR: odds ratio, 95% CI: 95% confidence interval. Bold font: statistically significant results ( $p < 0.05$ ). Abbreviations: GCS: Glasgow Coma Scale; ICU: intensive care unit; BMI: body mass index, CRP: C - reactive protein; T2DM: type 2 diabetes mellitus; ONS: oral nutritional supplement, SLT: speech and language therapist.

**Table S2.** Risk factors for  $\geq 10\%$  weight loss: Multivariate binary logistic regression with nutrition-related variables included.

| Variables                                             | $\geq 10\%$ weight loss during admission |              |
|-------------------------------------------------------|------------------------------------------|--------------|
|                                                       | OR, (95% CI)                             | P value      |
| Age on admission (years)                              | 1.00 (0.98-1.03)                         | 0.796        |
| Sex (male)                                            | 1.28 (0.59-2.80)                         | 0.530        |
| Length of hospital stay (weeks)                       | <b>1.32 (1.09-1.61)</b>                  | <b>0.005</b> |
| ICU admission                                         | 1.34 (0.44-4.03)                         | 0.603        |
| CRP $\geq 178$ mg/dl during admission                 | 1.09 (0.50-2.38)                         | 0.826        |
| Weight on admission (kg)                              | 1.06 (0.96-1.17)                         | 0.235        |
| Dysphagia on/during admission                         | 0.91 (0.36-2.29)                         | 0.837        |
| SpO <sub>2</sub> /FiO <sub>2</sub> ratio on admission | 0.99 (0.99-1.00)                         | 0.382        |
| Chronic neurological conditions                       | 0.96 (0.44-2.11)                         | 0.918        |
| Malnutrition screening tool score $\geq 6$            | 1.73 (0.74-4.05)                         | 0.207        |
| Total dietetic inputs during admission                | 0.95 (0.87-1.04)                         | 0.270        |
| ONS during admission                                  | 1.50 (0.59-3.81)                         | 0.393        |
| Artificial feeding during admission                   | 0.92 (0.28-2.97)                         | 0.887        |

Values present OR (95% CI) for all variables included in multivariate logistic regression, OR: odds ratio, 95% CI: 95% confidence interval. Bold font: statistically significant results ( $p < 0.05$ ). Total number of patients included in the analysis  $n = 214$ ,  $\geq 10\%$  weight loss during admission  $n = 39$ ,  $< 10\%$  weight loss during admission  $n = 175$ . Abbreviations: ICU: intensive care unit, CRP: C reactive protein, ONS: oral nutritional supplement; Comorbidity chronic neurological conditions include ICD-10-CM Codes G00-G99: Diseases of the nervous system; artificial feeding during admission includes any of: NG, NJ, PN, PEG/RIG. OR for Weight on admission is expressed for every 5kg of weight increase, OR for length of hospital stay is expressed per 1 week.

**Table S3.** Factors associated with more than one dietetic input after discharge: Univariable binary logistic regression models, variables adjusted for age.

| Variables                                             | Required more than one dietetic input after discharge<br>(>1 call from CUH dietitians or referral to community dietitians) |              |
|-------------------------------------------------------|----------------------------------------------------------------------------------------------------------------------------|--------------|
|                                                       | OR (95% CI)                                                                                                                | P value      |
| CRP $\geq$ 178 mg/dl during admission                 | <b>2.14 (1.22-3.78)</b>                                                                                                    | <b>0.008</b> |
| SpO <sub>2</sub> /FiO <sub>2</sub> ratio on admission | 1.00 (0.99-1.00)                                                                                                           | 0.508        |
| $\geq$ 10% weight loss during admission               | <b>2.65 (1.33-5.28)</b>                                                                                                    | <b>0.006</b> |
| Length of hospital stay (weeks)                       | 1.06 (0.99-1.14)                                                                                                           | 0.075        |
| ICU admission                                         | <b>2.03 (1.05-3.92)</b>                                                                                                    | <b>0.036</b> |
| Artificial Feeding during admission                   | <b>2.24 (1.19-4.23)</b>                                                                                                    | <b>0.012</b> |
| SLT assessment during admission                       | 1.68 (0.92-3.08)                                                                                                           | 0.090        |
| T2DM                                                  | 1.05 (0.57-1.93)                                                                                                           | 0.878        |
| Obesity                                               | 0.27 (0.06-1.16)                                                                                                           | 0.079        |
| Hypertension                                          | 1.06 (0.60-1.88)                                                                                                           | 0.829        |
| Chronic Neurological Conditions                       | 1.27 (0.70-2.29)                                                                                                           | 0.430        |

OR: odds ratio, 95% CI: 95% confidence interval. Bold font: statistically significant results ( $p < 0.05$ ). Abbreviations: ICU: intensive care unit, CRP: C-reactive protein, SLT: speech and language therapist, T2DM: type 2 diabetes mellitus.

**Table S4.** Factors associated with ONS GP prescription request: Univariable binary logistic regression models, variables adjusted for age.

| Variables                                             | Required ONS GP prescription request |         |
|-------------------------------------------------------|--------------------------------------|---------|
|                                                       | OR (95% CI)                          | P value |
| CRP $\geq 178$ mg/dl during admission                 | 1.49 (0.72-3.08)                     | 0.278   |
| SpO <sub>2</sub> /FiO <sub>2</sub> ratio on admission | 1.00 (0.99-1.01)                     | 0.259   |
| $\geq 10\%$ weight loss during admission              | 1.13 (0.43-2.99)                     | 0.802   |
| Length of hospital stay (weeks)                       | 1.01 (0.91-1.11)                     | 0.893   |
| ICU admission                                         | 0.89 (0.36-2.19)                     | 0.802   |
| Artificial feeding during admission                   | 1.04 (0.44-2.98)                     | 0.925   |
| SLT assessment during admission                       | 0.95 (0.41-2.20)                     | 0.904   |
| T2DM                                                  | 0.82 (0.35-1.89)                     | 0.636   |
| Obesity                                               | 0.00 (0.00-0.00)                     | 0.998   |
| Hypertension                                          | 1.50 (0.71- 3.19)                    | 0.290   |
| Chronic Neurological Conditions                       | 0.76 (0.33-1.74)                     | 0.512   |

OR: Odds ratio, 95% CI: 95% confidence interval. Bold font: statistically significant results ( $p < 0.05$ ). Abbreviations: ICU: intensive care unit, CRP: C-reactive protein, SLT: speech and language therapist, T2DM: type 2 diabetes mellitus.
